# Supplementary material
Source: PubMed Central journal article supplement (PMC10723927)
Supplement: cjasn-18-1573-s001.pdf [file cjasn-18-1573-s001.pdf]

## **Supplemental Material**

### **Table of Contents**

#### **Supplemental Materials and Methods**

**Supplemental Table 1.** Identification of immunoglobulins deposited in glomeruli

**Supplemental Table 2.** Proteomic analysis of glomeruli by laser microdissection and mass spectrometry associated with IgG subtype and light chain isotype

**Supplemental Table 3.** Correlation of urinary complements with clinicopathological parameters

#### **References**

## **Supplemental Materials and Methods**

### **Clinical and laboratory evaluation**

Estimated glomerular filtration rate (eGFR) was calculated using the Chronic Kidney Disease Epidemiology Collaboration equation<sup>1</sup>. Hypocomplementemia of C3 and C4 were considered with cutoffs of 60 mg/dl and 12 mg/dl. The abnormal serum free light chain ratio was identified beyond the range of 0.26–1.65 for patients with eGFR $\geq$ 60 ml/min/1.73 m<sup>2</sup> and beyond the range of 0.37–3.10 for patients with eGFR < 60 ml/min/1.73 m<sup>2</sup>. Complete remission was defined as remission of proteinuria to <500 mg/d with normal kidney function; partial remission was defined as a reduction in proteinuria by at least 50% and to <2 g/d with stable kidney function (no more than a 20% increase in serum creatinine compared with the baseline); and persistent kidney dysfunction was defined as failure to meet the criteria for either complete remission or partial remission but without kidney failure and included patients with unremitting proteinuria or progressive chronic kidney disease.

### **Kidney pathology**

All kidney biopsies were examined by standard light microscopy, immunofluorescence, and electron microscopy. Paraffin tissues were stained with hematoxylin and eosin, periodic acid-Schiff, Masson trichrome, and periodic acid–silver methenamine. Immunofluorescence staining on 3- $\mu$ m frozen tissues included IgG, IgM, IgA, C3, C1q, fibrinogen, albumin,  $\kappa$ ,  $\lambda$ , and IgG1-4. Two kidney pathologists made histopathologic diagnoses independently. Differences in diagnosis between them were resolved by rereviewing the biopsy slides to reach a consensus.

### **Proteomic analysis of glomeruli by laser microdissection and mass spectrometry (LMD/MS)**

Briefly, 10- $\mu$ m-thick sections of formalin-fixed paraffin-embedded tissues were stained with

hematoxylin. Nonsclerotic glomeruli were laser microdissected using a Leica dissector (Leica LMD7). Peptides extracted from the microdissected tissue were subjected to liquid chromatography-tandem mass spectrometry. Raw data files of mass spectrometry were queried using the Sequest algorithm. The results were combined and assigned peptide and protein probability scores in Proteome Discoverer 2.4. The proteins for which the expression value accounted for  $\geq 50\%$  of any group of samples were retained. The proteins with a missing value of  $\leq 50\%$  were filled with the mean value of the same group samples, and credible proteins were obtained by median normalization and log<sub>2</sub> conversion.

### **Detection of complement components deposited in kidneys by immunohistochemistry and immunofluorescence**

The primary antibodies used included fluorescein isothiocyanate (FITC)-conjugated rabbit anti-human antibodies against C3c and C1q (Dako, Glostrup, Denmark), murine anti-human factor Bb (Quidel, San Diego, CA, USA), mouse anti-human mannose-binding lectin (Hycult Biotech, Uden, the Netherlands), rabbit anti-human C4d antibody (Biomedica, Vienna, Austria) and mouse anti-human C5b-9 antibody (Abcam, Cambridge, UK). The primary antibodies were all diluted in 0.01 mmol/L phosphate buffered saline in 1:50. Sections of kidney tissue from patients with lupus nephritis and minimal change disease were used as positive and negative controls, respectively.

### **Statistical analysis**

In order to adjust for the influence of urinary protein excretion and increased levels of plasma complements on urinary complements concentration, an analysis of covariance model was used for adjustment: the model regarded the urinary level of complement components as a dependent variable, group as a factor and urinary protein excretion as a covariate. The nonnormally distributed data were

converted to normal distribution representation by logarithmic transformation, and values of zero were substituted by the minimum value.

**Supplemental Table 1. Identification of immunoglobulins deposited in glomeruli**

| <b>Case No.</b> | <b>LMD/MS</b> | <b>Positive immunoglobulins on immunofluorescence</b> |
|-----------------|---------------|-------------------------------------------------------|
| P1              | IgG3          | IgG (3+), IgG3 (1+), κ (2-3+), λ Trace                |
| P2              | IgG3λ         | IgG (4+), IgG3 (3+), κ Trace, λ (4+)                  |
| P3              | IgG3κ         | IgG (3+), IgG3 (2+), κ (3+), λ Trace                  |
| P4              | IgG3λ         | IgG (3+), IgG3 (2+), κ Trace, λ (3+)                  |
| P5              | IgG3κ         | IgG (2+), IgG3 (3+), κ (2-3+), λ Trace                |
| P6              | IgG1κ         | IgG (1+), IgG1 (1-2+), κ (2-3+), λ Trace              |
| P7              | IgG1          | IgG (3+), IgG1 (3+), κ (3+), λ (-)                    |
| P8              | IgG1          | IgG (2-3+), IgG1 (2+), κ (2+), λ Trace                |
| P9              | IgG1          | IgG (3+), IgG1 (2+), κ (2+), λ (-)                    |
| P10             | IgG3κ         | IgG (2+), IgG3 (2+), κ (2-3+), λ Trace                |

**Supplemental Table 2. Proteomic analysis of glomeruli by laser microdissection and mass spectrometry associated with IgG subtype and light chain isotype**

| Description                           | Accession  | Abundance |        |        |        |        |        |        |        |        |        |
|---------------------------------------|------------|-----------|--------|--------|--------|--------|--------|--------|--------|--------|--------|
|                                       |            | P1        | P2     | P3     | P4     | P5     | P6     | P7     | P8     | P9     | P10    |
| Immunoglobulin heavy constant gamma 1 | P01857     | 383.4     | 166.7  | 434.7  | 671.9  | 857.3  | 3330.9 | 3190.0 | 4324.3 | 8609.9 | 319.0  |
| Immunoglobulin heavy constant gamma 2 | P01859     | 218.4     | 106.0  | 90.0   | 156.5  | 194.7  | 85.7   | 113.4  | 129.0  | 259.5  | 46.3   |
| Immunoglobulin heavy constant gamma 3 | P01860     | 2852.6    | 6031.5 | 4855.2 | 6682.9 | 5592.9 | 329.6  | 6.7    | 23.7   | 54.1   | 2635.0 |
| Immunoglobulin heavy constant gamma 4 | P01861     | 6.8       | 7.9    | 5.5    | 106.1  | 24.2   | 26.5   | 60.4   | 3.5    | 39.6   | 10.8   |
| Immunoglobulin kappa constant         | P01834     | 771.7     | 137.2  | 458.2  | 472.4  | 758.1  | 1278.2 | 932.2  | 255.6  | 564.1  | 390.7  |
| Immunoglobulin kappa joining 1        | A0A0A0MT89 |           |        |        | 40.8   |        |        |        |        |        |        |
| Immunoglobulin kappa light chain      | P0DOX7     | 19.6      | 253.6  | 771.7  | 477.1  | 1272.9 | 15.1   | 13.6   | 604.3  | 1105.4 | 499.0  |
| Immunoglobulin kappa variable 1-17    | P01599     |           |        |        |        |        | 6.6    | 5.5    | 5.1    | 17.1   |        |
| Immunoglobulin kappa variable 1-27    | A0A075B6S5 | 14.3      | 3.8    | 1.2    | 3.4    | 13.4   | 6.0    | 46.1   | 9.4    | 49.8   |        |
| Immunoglobulin kappa variable 1-6     | A0A0C4DH72 | 175.5     | 83.2   | 8.1    | 83.2   | 83.2   | 522.0  |        | 26.2   | 84.3   | 16.0   |
| Immunoglobulin kappa variable 1D-33   | P01593     |           |        |        | 3.7    |        |        |        |        |        | 4.3    |
| Immunoglobulin kappa variable 2-29    | A2NJV5     |           |        | 117.4  |        |        |        |        |        |        |        |
| Immunoglobulin kappa variable 2-40    | A0A087WW87 | 68.0      | 56.8   |        | 45.6   | 468.8  | 73.0   |        | 95.2   | 198.6  | 47.9   |
| Immunoglobulin kappa variable 3-15    | P01624     | 53.0      |        | 1349.3 | 73.2   | 66.0   | 67.7   | 54.5   | 97.8   | 143.9  | 59.8   |
| Immunoglobulin kappa variable 3-20    | P01619     | 198.8     | 40.8   | 69.2   | 185.8  |        |        | 97.7   | 174.9  | 114.2  | 114.0  |
| Immunoglobulin kappa variable 3D-11   | A0A0A0MRZ8 |           | 33.8   | 71.3   | 34.7   | 45.2   |        | 38.3   |        | 94.7   | 37.4   |

**Supplemental Table 2. Proteomic analysis of glomeruli by laser microdissection and mass spectrometry associated with IgG subtype and light chain isotype**

| Description                          | Accession  | Abundance |        |       |        |       |       |       |       |       |       |
|--------------------------------------|------------|-----------|--------|-------|--------|-------|-------|-------|-------|-------|-------|
|                                      |            | P1        | P2     | P3    | P4     | P5    | P6    | P7    | P8    | P9    | P10   |
| Immunoglobulin kappa variable 3D-15  | A0A087WSY6 |           |        | 7.8   |        |       |       |       |       |       | 25.7  |
| Immunoglobulin kappa variable 3D-20  | A0A0C4DH25 | 6.4       |        | 89.5  |        | 114.8 | 59.9  |       |       |       | 136.8 |
| Immunoglobulin kappa variable 4-1    | P06312     | 10.6      |        | 8.2   | 20.2   | 7.6   | 13.0  |       |       | 17.8  | 6.0   |
| Immunoglobulin lambda constant 2     | P0DOY2     | 378.2     | 2439.0 | 409.7 | 577.1  | 544.0 | 292.6 | 384.8 | 439.9 | 537.1 | 94.9  |
| Immunoglobulin lambda constant 7     | A0M8Q6     |           |        |       | 1525.9 |       |       |       |       |       | 48.8  |
| Immunoglobulin lambda variable 10-54 | A0A075B6I4 |           |        |       |        |       |       |       |       |       | 7.6   |
| Immunoglobulin lambda variable 1-44  | P01699     |           |        |       |        |       |       |       |       |       | 6.3   |
| Immunoglobulin lambda variable 1-47  | P01700     | 22.5      |        | 35.9  | 24.3   | 38.7  | 30.9  | 27.7  | 65.5  |       | 4.2   |
| Immunoglobulin lambda variable 1-51  | P01701     |           | 453.4  |       |        | 55.2  |       | 53.7  |       |       | 177.0 |
| Immunoglobulin lambda variable 2-11  | P01706     |           |        |       |        |       | 4.7   |       |       |       |       |
| Immunoglobulin lambda variable 3-1   | P01715     | 63.6      |        |       |        |       |       |       |       |       | 95.3  |
| Immunoglobulin lambda variable 3-19  | P01714     |           | 36.6   |       |        | 9.1   |       |       |       |       |       |
| Immunoglobulin lambda variable 3-21  | P80748     | 13.4      | 15.2   | 8.8   | 38.9   | 28.3  | 9.3   | 21.8  | 32.1  | 42.3  | 16.7  |
| Immunoglobulin lambda variable 3-27  | P01718     | 7.5       |        | 7.0   | 6.5    | 9.9   |       | 6.4   |       | 22.0  | 11.3  |
| Immunoglobulin lambda variable 4-69  | A0A075B6H9 | 9.8       | 6.2    |       |        | 12.8  | 8.4   | 10.1  | 9.6   | 13.0  |       |
| Immunoglobulin lambda variable 7-46  | A0A075B6I9 | 7.9       |        | 11.5  | 13.7   | 27.8  | 11.5  | 13.7  |       | 33.4  | 8.5   |

**Supplemental Table 2. Proteomic analysis of glomeruli by laser microdissection and mass spectrometry associated with IgG subtype and light chain isotype**

| Description                              | Accession  | Abundance |      |       |       |       |       |      |       |       |       |
|------------------------------------------|------------|-----------|------|-------|-------|-------|-------|------|-------|-------|-------|
|                                          |            | P1        | P2   | P3    | P4    | P5    | P6    | P7   | P8    | P9    | P10   |
| Immunoglobulin lambda variable 9-49      | A0A0B4J1Y8 | 19.9      |      | 2.2   |       | 7.6   | 5.3   | 3.8  |       |       | 2.7   |
| Immunoglobulin lambda-1 light chain      | P0DOX8     | 310.3     |      |       |       |       |       |      |       |       | 214.9 |
| Immunoglobulin lambda-like polypeptide 1 | P15814     |           |      |       | 2.5   |       |       |      |       |       |       |
| Immunoglobulin lambda-like polypeptide 5 | B9A064     |           | 72.4 | 147.7 | 105.6 | 301.5 | 196.5 | 80.1 | 127.8 | 296.6 |       |



**Supplemental Table 3. Correlation of urinary complements with clinicopathological parameters**

| Parameter                                      | Serum creatinine at biopsy (mg/dl) |          | Urinary protein excretion (g/d) |          | Percentage of crescents (%) |          | Percentage of global glomerulosclerosis (%) |          |
|------------------------------------------------|------------------------------------|----------|---------------------------------|----------|-----------------------------|----------|---------------------------------------------|----------|
|                                                | <i>r</i>                           | <i>P</i> | <i>r</i>                        | <i>P</i> | <i>r</i>                    | <i>P</i> | <i>r</i>                                    | <i>P</i> |
| Urinary C3a/creatinine (ng/mg)                 | 0.54                               | <0.001   | 0.55                            | <0.001   | 0.46                        | 0.002    | 0.54                                        | <0.001   |
| Urinary C5a/creatinine (ng/mg)                 | 0.58                               | <0.001   | 0.58                            | <0.001   | 0.46                        | 0.002    | 0.43                                        | 0.004    |
| Urinary sC5b-9/creatinine (ng/mg) <sup>a</sup> | 0.47                               | 0.001    | 0.54                            | <0.001   | 0.36                        | 0.02     | 0.53                                        | <0.001   |
| Urinary C4d/creatinine (µg/mg)                 | 0.48                               | 0.001    | 0.59                            | <0.001   | 0.46                        | 0.002    | 0.54                                        | <0.001   |
| Urinary C1q/creatinine (ng/mg)                 | 0.26                               | 0.09     | 0.32                            | 0.04     | 0.40                        | 0.01     | 0.63                                        | <0.001   |
| Urinary MBL/creatinine (ng/mg) <sup>b</sup>    | 0.56                               | <0.001   | 0.51                            | 0.001    | 0.44                        | 0.003    | 0.43                                        | 0.004    |
| Urinary Bb/creatinine (µg/mg)                  | 0.46                               | 0.002    | 0.49                            | 0.001    | 0.36                        | 0.02     | 0.48                                        | 0.001    |

<sup>a</sup> sC5b-9, soluble C5b-9;

<sup>b</sup> MBL, mannose-binding lectin.

## References

1. Levey AS, Stevens LA, Schmid CH, Zhang YL, Castro AF, Feldman HI, Kusek JW, Eggers P, Van Lente F, Greene T, Coresh J: A new equation to estimate glomerular filtration rate. *Ann Intern Med*, 150: 604-612, 2009
2. Hutchison CA, Harding S, Hewins P, Mead GP, Townsend J, Bradwell AR, Cockwell P: Quantitative assessment of serum and urinary polyclonal free light chains in patients with chronic kidney disease. *Clinical journal of the American Society of Nephrology : CJASN*, 3: 1684-1690, 2008 10.2215/cjn.02290508
